# Supplementary material
Source: PubMed Central journal article supplement (PMC3262870)
Supplement: hdy201153x2.pdf [file hdy201153x2.pdf]

Supplementary table 2

| Cross # | Male x Female (n)                                                           | son          | daughter     | Family size ( $\pm$ SE) | % Males ( $\pm$ SE) |
|---------|-----------------------------------------------------------------------------|--------------|--------------|-------------------------|---------------------|
| 1       | (w A) <sub>UT4</sub> [UT4] x (w A) <sub>UT4</sub> [UT4] (17)                | 14.65        | 57.59        | 72.24 (6.65)            | 20.11 (2.03)        |
| 2       | (w Aw B1) <sub>UT1</sub> [UT1] x (w Aw B1) <sub>UT1</sub> [UT1] (26)        | 10.27        | 76.15        | 86.42 (1.26)            | 11.95 (1.26)        |
| 3       | (w Aw B2) <sub>UT2</sub> [UT2] x (w Aw B2) <sub>UT2</sub> [UT2] (34)        | 12.15        | 75.29        | 87.44 (4.13)            | 13.79 (2.23)        |
| 4       | (w Aw B1w B2) <sub>UT3</sub> [UT3] x (w Aw B1w B2) <sub>UT3</sub> [UT3] (8) | 7.75         | 72           | 79.75 (3.53)            | 9.77 (0.82)         |
| 5       | (w Aw B1) <sub>UT1</sub> [UT1] x (w A) <sub>UT4</sub> [UT4] (21)            | <b>12.45</b> | <b>42.38</b> | <b>54.83 (4.65)</b>     | <b>22.92 (5.93)</b> |
| 6       | (w Aw B2) <sub>UT2</sub> [UT2] x (w A) <sub>UT4</sub> [UT4] (28)            | <b>9.36</b>  | <b>31.11</b> | <b>40.47 (4.39)</b>     | <b>24.47 (7.21)</b> |
| 7       | (w Aw B1w B2) <sub>UT3</sub> [UT3] x (w A) <sub>UT4</sub> [UT4] (28)        | <b>11.68</b> | <b>23.14</b> | <b>34.82 (3.19)</b>     | <b>33.58 (5.97)</b> |
| 8       | (w A) <sub>UT4</sub> [UT4] x (w Aw B1) <sub>UT1</sub> [UT1] (30)            | 12.77        | 71.13        | 83.9 (3.23)             | 14.87 (2.22)        |
| 9       | (w A) <sub>UT4</sub> [UT4] x (w Aw B2) <sub>UT2</sub> [UT2] (16)            | 8.19         | 72.38        | 80.57 (5.03)            | 10.18 (1.14)        |
| 10      | (w A) <sub>UT4</sub> [UT4] x (w Aw B1w B2) <sub>UT3</sub> [UT3] (9)         | 9.56         | 70.33        | 79.89 (2.86)            | 11.92 (1.71)        |
| 11      | 0[UT1] x 0[UT1] (23)                                                        | 13.39        | 67           | 80.39 (3.39)            | 16.87 (0.84)        |
| 12      | 0[UT2] x 0[UT2] (23)                                                        | 12.35        | 72.96        | 85.31 (3.09)            | 14.75 (1.15)        |
| 13      | 0[UT3] x 0[UT3] (25)                                                        | 12.68        | 69.48        | 82.16 (3.09)            | 15.60 (0.95)        |
| 14      | 0[UT4] x 0[UT4] (22)                                                        | 13.14        | 59.18        | 72.32 (2.73)            | 18.13 (0.85)        |
| 15      | 0[UT1] x 0[UT4] (21)                                                        | 13.33        | 58.57        | 71.9 (4.04)             | 18.83 (2.03)        |
| 16      | 0[UT2] x 0[UT4] (19)                                                        | 15.16        | 57.74        | 72.9 (3.77)             | 20.91 (1.67)        |
| 17      | 0[UT3] x 0[UT4] (17)                                                        | 14           | 64.06        | 78.06 (4.40)            | 17.80 (1.39)        |
| 18      | 0[UT4] x 0[UT1] (25)                                                        | 15.92        | 60.2         | 76.12 (3.22)            | 21.09 (1.25)        |
| 19      | 0[UT4] x 0[UT2] (22)                                                        | 14.36        | 69.18        | 83.54 (2.71)            | 17.28 (1.13)        |
| 20      | (w A) <sub>UT4</sub> [UT4] x 0[UT4] (17)                                    | <b>19.12</b> | <b>20.82</b> | <b>39.94 (3.68)</b>     | <b>49.60 (4.43)</b> |
| 21      | (w A) <sub>UT4</sub> [UT4] x 0[CA] (27)                                     | <b>13.74</b> | <b>22.78</b> | <b>36.52 (3.04)</b>     | <b>42.51 (3.54)</b> |
| 22      | (w Aw B1w B2) <sub>UT3</sub> [UT3] x (w Aw B1) <sub>UT1</sub> [UT1] (26)    | 9.26         | 42.9         | 52.16 (5.28)            | 17.58 (2.71)        |
| 23      | (w Aw B1w B2) <sub>UT3</sub> [UT3] x (w Aw B2) <sub>UT2</sub> [UT2] (27)    | 8.07         | 59.07        | 67.14 (8.55)            | 12.48 (1.26)        |
| 24      | 0[UT3] x 0[UT1] (20)                                                        | 14.2         | 69.25        | 83.45 (4.17)            | 17.22 (0.39)        |
| 25      | 0[UT3] x 0[UT2] (22)                                                        | 12.68        | 69.86        | 82.54 (5.49)            | 15.58 (1.32)        |
| 26      | 0[UT1] x 0[UT3] (24)                                                        | 14.25        | 69.38        | 83.63 (3.41)            | 17.22 (0.96)        |
| 27      | 0[UT2] x 0[UT3] (21)                                                        | 14.05        | 71.76        | 85.81 (3.25)            | 16.44 (0.76)        |
| 28      | 0[UT4] x 0[UT3] (19)                                                        | 16.74        | 59.79        | 76.53 (3.73)            | 21.97 (1.16)        |
| 29      | (w Aw B2) <sub>UT2</sub> [UT2] x (w Aw B1) <sub>UT1</sub> [UT1] (26)        | 11.66        | 29.52        | 41.18 (6.35)            | 25.95 (2.9)         |
| 30      | (w Aw B1) <sub>UT1</sub> [UT1] x (w Aw B2) <sub>UT2</sub> [UT2] (27)        | 15.67        | 39.67        | 55.34 (8.57)            | 32.17(8.57)         |
| 31      | 0[UT2] x 0[UT1] (25)                                                        | 14.16        | 68.44        | 82.6 (5.66)             | 17.46 (1.24)        |
| 32      | 0[UT1] x 0[UT2] (19)                                                        | 13           | 73.84        | 86.84 (4.21)            | 15.32 (1.82)        |
| 33      | 0[CA] x 0[CA] (32)                                                          | 11.09        | 85.47        | 96.56 (4.94)            | 11.50 (2.36)        |
| 34      | (w Aw B1) <sub>UT1</sub> [CA] x 0[CA] (22)                                  | 17.86        | 41.82        | 59.68 (4.97)            | 30.46 (2.54)        |
| 35      | (w Aw B2) <sub>UT2</sub> [CA] x 0[CA] (20)                                  | 18.35        | 33           | 51.35 (4.28)            | 36.54 (3.05)        |
| 36      | (w Aw B2) <sub>UT2</sub> [CA] x (w Aw B2) <sub>UT2</sub> [CA] (11)          | 9.45         | 88           | 97.45 (5.39)            | 9.62 (0.70)         |
| 37      | (w Aw B1) <sub>UT1</sub> [CA] x (w Aw B2) <sub>UT2</sub> [CA] (22)          | 14.95        | 77.23        | 92.18 (7.75)            | 15.98 (6.31)        |
| 38      | (w Aw B1) <sub>UT1</sub> [CA] x (w Aw B1) <sub>UT1</sub> [CA] (21)          | 11           | 99.19        | 110.19 (3.84)           | 9.87 (1.26)         |
| 39      | (w Aw B2) <sub>UT2</sub> [CA] x (w Aw B1) <sub>UT1</sub> [CA] (21)          | 11.86        | 55           | 66.86 (5.30)            | 17.51 (2.41)        |
| 40      | (w Aw B2) <sub>UT2</sub> [UT1] x (w Aw B2) <sub>UT2</sub> [UT1] (24)        | 11.54        | 79.58        | 91.12 (3.14)            | 12.66 (0.92)        |
| 41      | (w Aw B1) <sub>UT1</sub> [UT1] x (w Aw B2) <sub>UT2</sub> [UT1] (19)        | 18.37        | 49.32        | 67.69 (2.41)            | 27.46 (1.96)        |
| 42      | (w Aw B1) <sub>UT1</sub> [UT1] x (w Aw B1) <sub>UT1</sub> [UT1] (23)        | 10.52        | 82.52        | 93.04 (2.19)            | 11.37 (0.66)        |
| 43      | (w Aw B2) <sub>UT2</sub> [UT1] x (w Aw B1) <sub>UT1</sub> [UT1] (20)        | 15.8         | 40.6         | 56.4 (1.84)             | 28.08 (1.01)        |
| 44      | (w Aw B2) <sub>UT2</sub> [UT2] x (w Aw B2) <sub>UT2</sub> [UT2] (24)        | 11.63        | 78.54        | 90.17 (4.61)            | 12.97 (0.79)        |
| 45      | (w Aw B1) <sub>UT1</sub> [UT2] x (w Aw B2) <sub>UT2</sub> [UT2] (26)        | 15.5         | 69.62        | 85.12 (3.72)            | 18.39 (1.08)        |
| 46      | (w Aw B1) <sub>UT1</sub> [UT2] x (w Aw B1) <sub>UT1</sub> [UT2] (21)        | 13.81        | 75.48        | 89.29 (2.78)            | 15.64 (0.91)        |
| 47      | (w Aw B2) <sub>UT2</sub> [UT2] x (w Aw B1) <sub>UT1</sub> [UT2] (19)        | 20.42        | 32.89        | 53.31 (4.01)            | 39.72 (3.66)        |
