# Supplementary material
Source: PubMed Central journal article supplement (PMC3262870)
Supplement: hdy201153x3.pdf [file hdy201153x3.pdf]

Supplementary table 3

| Cross # | Male x Female (n)                                                            | son          | daughter     | Family size ( $\pm$ SE) | % Males ( $\pm$ SE) |
|---------|------------------------------------------------------------------------------|--------------|--------------|-------------------------|---------------------|
| 1       | (w A) <sub>UT4</sub> [UT4] x (w A) <sub>UT4</sub> [UT4] (21)                 | 12.1         | 61.14        | 73.24 (2.78)            | 16.38 (2.21)        |
| 2       | (w Aw B1) <sub>UT1</sub> [UT1] x (w Aw B1) <sub>UT1</sub> [UT1] (23)         | 10.09        | 79.91        | 90 (2.80)               | 11.24 (0.91)        |
| 3       | (w Aw B2) <sub>UT2</sub> [UT2] x (w Aw B2) <sub>UT2</sub> [UT2] (19)         | 8.63         | 77.47        | 86.1 (5.25)             | 10.11 (0.81)        |
| 4       | (w Aw B1w B2) <sub>UT3</sub> [UT3] x (w Aw B1w B2) <sub>UT3</sub> [UT3] (25) | 10.88        | 71.96        | 82.84 (5.26)            | 13.01 (1.62)        |
| 5       | <b>(w Aw B1)<sub>UT1</sub>[UT1] x (w A)<sub>UT4</sub>[UT4] (25)</b>          | <b>17.04</b> | <b>34.5</b>  | <b>51.54 (4.13)</b>     | <b>32.74 (2.89)</b> |
| 6       | <b>(w Aw B2)<sub>UT2</sub>[UT2] x (w A)<sub>UT4</sub>[UT4] (25)</b>          | <b>16.92</b> | <b>31.6</b>  | <b>48.52 (3.66)</b>     | <b>35.19 (1.97)</b> |
| 7       | <b>(w Aw B1w B2)<sub>UT3</sub>[UT3] x (w A)<sub>UT4</sub>[UT4] (18)</b>      | <b>15.56</b> | <b>23.39</b> | <b>38.95 (1.24)</b>     | <b>40.42 (4.10)</b> |
| 8       | (w A) <sub>UT4</sub> [UT4] x (w Aw B1) <sub>UT1</sub> [UT1] (26)             | 11.62        | 75.62        | 87.24 (3.87)            | 13.16 (1.39)        |
| 9       | (w A) <sub>UT4</sub> [UT4] x (w Aw B2) <sub>UT2</sub> [UT2] (24)             | 7.5          | 70.83        | 78.33 (3.48)            | 9.45 (1.36)         |
| 10      | (w A) <sub>UT4</sub> [UT4] x (w Aw B1w B2) <sub>UT3</sub> [UT3] (21)         | 9.43         | 65.75        | 75.18 (2.89)            | 12.37 (0.58)        |
| 11      | 0[UT1] x 0[UT1] (25)                                                         | 15.08        | 70.2         | 85.28 (3.72)            | 17.80 (1.04)        |
| 12      | 0[UT2] x 0[UT2] (18)                                                         | 12.61        | 70.5         | 83.11 (2.81)            | 15.38 (1.67)        |
| 13      | 0[UT3] x 0[UT3] (22)                                                         | 14.86        | 65.82        | 80.68 (3.27)            | 18.75 (1.33)        |
| 14      | 0[UT4] x 0[UT4] (18)                                                         | 13.84        | 65.37        | 79.21 (2.42)            | 17.66 (1.68)        |
| 15      | 0[UT1] x 0[UT4] (21)                                                         | 13.86        | 62.19        | 76.05 (2.59)            | 18.54 (2.34)        |
| 16      | 0[UT2] x 0[UT4] (25)                                                         | 14.12        | 58.92        | 73.04 (2.92)            | 19.72 (1.42)        |
| 17      | 0[UT3] x 0[UT4] (22)                                                         | 12.91        | 59.45        | 72.36 (4.28)            | 18.28 (2.22)        |
| 18      | 0[UT4] x 0[UT1] (24)                                                         | 16.33        | 61.71        | 78.04 (4.37)            | 21.46 (2.05)        |
| 19      | 0[UT4] x 0[UT2] (24)                                                         | 13.25        | 68.04        | 81.29 (2.95)            | 16.33 (0.83)        |
| 20      | <b>(w A)<sub>UT4</sub>[UT4] x 0[UT4] (24)</b>                                | <b>16.08</b> | <b>25.08</b> | <b>41.17 (4.69)</b>     | <b>44.30 (6.03)</b> |
| 21      | <b>(w A)<sub>UT4</sub>[UT4] x 0[CA] (25)</b>                                 | <b>16.08</b> | <b>18.36</b> | <b>34.44 (2.87)</b>     | <b>49.39 (4.12)</b> |
| 22      | <b>(w Aw B1w B2)<sub>UT3</sub>[UT3] x (w Aw B1)<sub>UT1</sub>[UT1] (29)</b>  | <b>12.24</b> | <b>37.59</b> | <b>49.83 (4.29)</b>     | <b>24.70 (2.97)</b> |
| 23      | <b>(w Aw B1w B2)<sub>UT3</sub>[UT3] x (w Aw B2)<sub>UT2</sub>[UT2] (31)</b>  | <b>12.03</b> | <b>44.26</b> | <b>56.29 (4.62)</b>     | <b>22.26 (3.37)</b> |
| 24      | 0[UT3] x 0[UT1] (24)                                                         | 14.42        | 70.29        | 84.71 (4.10)            | 17.24 (0.76)        |
| 25      | 0[UT3] x 0[UT2] (25)                                                         | 13           | 68.92        | 81.92 (3.27)            | 16.26 (1.78)        |
| 26      | 0[UT1] x 0[UT3] (19)                                                         | 14.26        | 65.79        | 80.05 (5.78)            | 18.19 (1.97)        |
| 27      | 0[UT2] x 0[UT3] (17)                                                         | 14           | 70.71        | 84.71 (2.63)            | 16.71 (1.21)        |
| 28      | 0[UT4] x 0[UT3] (22)                                                         | 16.36        | 59.91        | 76.27 (5.78)            | 21.63 (1.79)        |
| 29      | <b>(w Aw B2)<sub>UT2</sub>[UT2] x (w Aw B1)<sub>UT1</sub>[UT1] (29)</b>      | <b>11.86</b> | <b>46.03</b> | <b>57.89 (4.20)</b>     | <b>20.87 (5.38)</b> |
| 30      | <b>(w Aw B1)<sub>UT1</sub>[UT1] x (w Aw B2)<sub>UT2</sub>[UT2] (30)</b>      | <b>17.79</b> | <b>31.17</b> | <b>48.96 (3.93)</b>     | <b>36.19 (6.15)</b> |
| 31      | 0[UT2] x 0[UT1] (22)                                                         | 13.68        | 70.36        | 84.04 (4.34)            | 16.40 (1.12)        |
| 32      | 0[UT1] x 0[UT2] (25)                                                         | 13.08        | 69.48        | 82.56 (4.26)            | 15.92 (0.50)        |
| 33      | 0[CA] x 0[CA] (29)                                                           | 9.97         | 85.14        | 95.10 (5.51)            | 10.54 (1.61)        |
| 34      | <b>(w Aw B1)<sub>UT1</sub>[CA] x 0[CA] (21)</b>                              | <b>18.81</b> | <b>47.86</b> | <b>66.67 (5.56)</b>     | <b>28.98 (2.41)</b> |
| 35      | <b>(w Aw B2)<sub>UT2</sub>[CA] x 0[CA] (20)</b>                              | <b>16.57</b> | <b>41.61</b> | <b>58.17 (4.85)</b>     | <b>29.16 (2.43)</b> |
| 36      | (w Aw B2) <sub>UT2</sub> [CA] x (w Aw B2) <sub>UT2</sub> [CA] (18)           | 10.06        | 88.11        | 98.17 (2.79)            | 10.22 (0.76)        |
| 37      | (w Aw B1) <sub>UT1</sub> [CA] x (w Aw B2) <sub>UT2</sub> [CA] (24)           | 13.04        | 76.54        | 89.58 (4.60)            | 14.90 (2.84)        |
| 38      | (w Aw B1) <sub>UT1</sub> [CA] x (w Aw B1) <sub>UT1</sub> [CA] (25)           | 10           | 87.88        | 97.88 (4.72)            | 10.30 (1.65)        |
| 39      | (w Aw B2) <sub>UT2</sub> [CA] x (w Aw B1) <sub>UT1</sub> [CA] (25)           | 14.32        | 45.04        | 59.36 (6.33)            | 27.04 (4.75)        |
| 40      | (w Aw B2) <sub>UT2</sub> [UT1] x (w Aw B2) <sub>UT2</sub> [UT1] (26)         | 12.08        | 78.04        | 90.12 (3.19)            | 13.54 (1.21)        |
| 41      | (w Aw B1) <sub>UT1</sub> [UT1] x (w Aw B2) <sub>UT2</sub> [UT1] (23)         | 17.65        | 49.39        | 67.04 (3.26)            | 26.09 (2.12)        |
| 42      | (w Aw B1) <sub>UT1</sub> [UT1] x (w Aw B1) <sub>UT1</sub> [UT1] (28)         | 11.64        | 85.57        | 97.21 (3.68)            | 12.01 (0.59)        |
| 43      | (w Aw B2) <sub>UT2</sub> [UT1] x (w Aw B1) <sub>UT1</sub> [UT1] (24)         | 16.58        | 41.88        | 58.46 (2.56)            | 29.06 (2.06)        |
| 44      | (w Aw B2) <sub>UT2</sub> [UT2] x (w Aw B2) <sub>UT2</sub> [UT2] (25)         | 14.92        | 73.56        | 88.48 (2.55)            | 16.89 (0.79)        |
| 45      | (w Aw B1) <sub>UT1</sub> [UT2] x (w Aw B2) <sub>UT2</sub> [UT2] (28)         | 16.04        | 66.96        | 83 (2.56)               | 19.65 (1.64)        |
| 46      | (w Aw B1) <sub>UT1</sub> [UT2] x (w Aw B1) <sub>UT1</sub> [UT2] (24)         | 14.04        | 70.5         | 84.54 (2.07)            | 16.62 (0.65)        |
| 47      | (w Aw B2) <sub>UT2</sub> [UT2] x (w Aw B1) <sub>UT1</sub> [UT2] (25)         | 19.08        | 37.24        | 56.32 (4.50)            | 36.05 (3.18)        |
